# Supplementary material for: Antisolvent polysulfone dielectric for ultrastable solution-processed high-performance conformal organic transistor array
Source: Royal Society of Chemistry journal article supplement (doi:10.1039/d4tc00855c), 2024-01-01
Supplement: d4tc00855c1.pdf [file d4tc00855c1.pdf]

## **Antisolvent Polysulfone Dielectric for Ultrastable Solution-Processed High-Performance Conformal Organic Transistor Array**

Mingxin Zhang,<sup>†</sup> Mengqiao Du,<sup>†</sup> Yanhong Tong,<sup>\*</sup> Xue Wang, Jing Sun, Shanlei Guo, Xiaoli Zhao, Qingxin Tang,<sup>\*</sup> and Yichun Liu

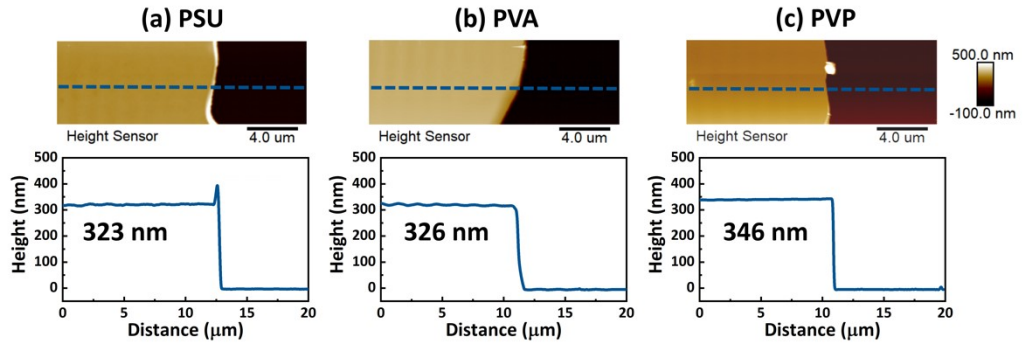

**Fig. S1.** The thickness of PSU, PVA, and PVP film.

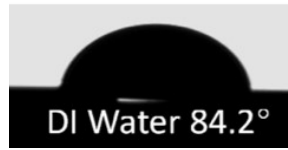

**Fig. S2.** The contact angle of PSU dielectric.

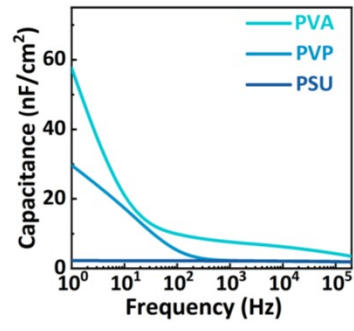

**Fig. S3.** The capacitance-frequency curves of PVA, PVP, and PSU dielectrics.

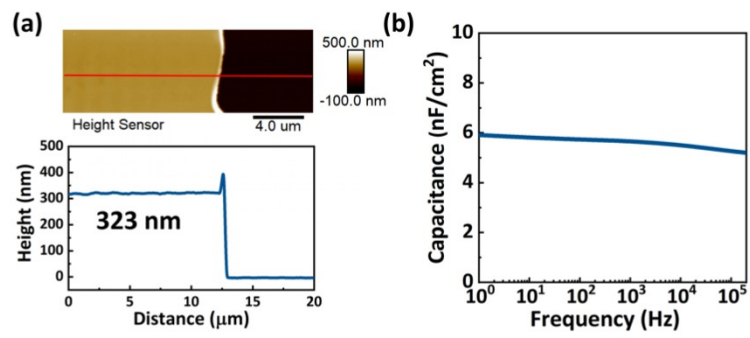

**Fig. S4.** (a) AFM images of the dielectric thickness and (b) capacitance-frequency curves of PSU dielectric.

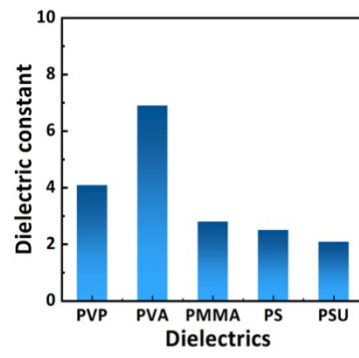

Fig. S5. The dielectric constant of PVA, PVP, PMMA, PS, and PSU.

**Table S1.** The transmittance of the reported OFETs.

| Semiconductor                  | Electrode           | Gate electrode      | Dielectric                     | Transmittance (%) | Ref.     |
|--------------------------------|---------------------|---------------------|--------------------------------|-------------------|----------|
| IGZO                           | ITO                 | ITO                 | Al <sub>2</sub> O <sub>3</sub> | >60 %             | [1]      |
| In <sub>2</sub> O <sub>3</sub> | Graphene/<br>Au     | Graphene/Au         | ZAO                            | 90 %              | [2]      |
| IZO                            | ITO                 | ITO                 | Al <sub>2</sub> O <sub>3</sub> | 80 %              | [3]      |
| R-GO/PU                        | (PEDOT:PSS)/PUD     | (PEDOT:PSS)/PUD     | PU                             | 75 %              | [4]      |
| Graphene                       | Graphene            | Graphene            | SU-8                           | 70 %              | [5]      |
| S-SWCNT                        | AgNW                | AgNW/PUA            | epoxy<br>PU-co-<br>PEO         | /                 | [6]      |
| Graphene                       | Graphene/<br>AgNW   | Graphene/AgNW       | polyethylene                   | >80 %             | [7]      |
| SWCNT                          | (AgNW)-<br>PUA      | (AgNW)-PUA          | PU-co-<br>PEG                  | >90 %             | [8]      |
| CNT                            | Graphene            | Graphene            | Al <sub>2</sub> O <sub>3</sub> | 80 %              | [9]      |
| Graphene                       | Graphene            | PEDOT:PSS           | ion gel                        | /                 | [10]     |
| C8-BTBT                        | PEDOT:PSS<br>/SWCNT | PEDOT:PSS<br>/SWCNT | c-PVA                          | >80 %             | [11]     |
| C8-BTBT                        | Au                  | Au                  | c-PVA                          | >80 %             | [12]     |
| 29-DPP-TV                      | PEDOT:PSS           | PEDOT:PSS           | PVF                            | >80 %             | [13]     |
| C8-BTBT/PS                     | Ag                  | ITO                 | PVP-HDA                        | >90 %             | [14]     |
| C8-BTBT                        | Au                  | PEDOT: PSS          | PSU                            | 96.1 %            | Our work |

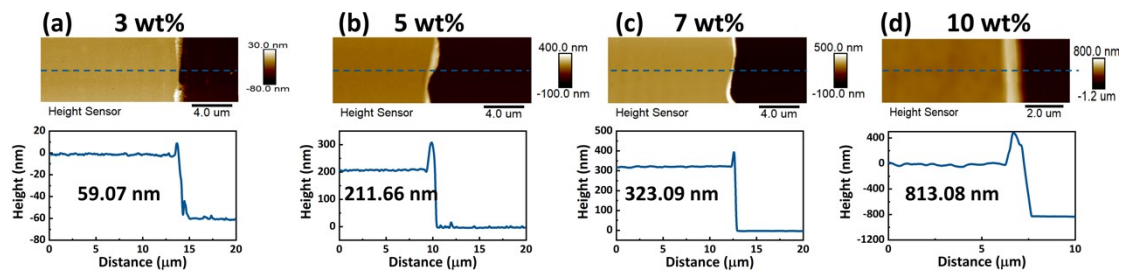

**Fig. S6.** The AFM images and dielectric thickness of the different PSU thickness OFETs.



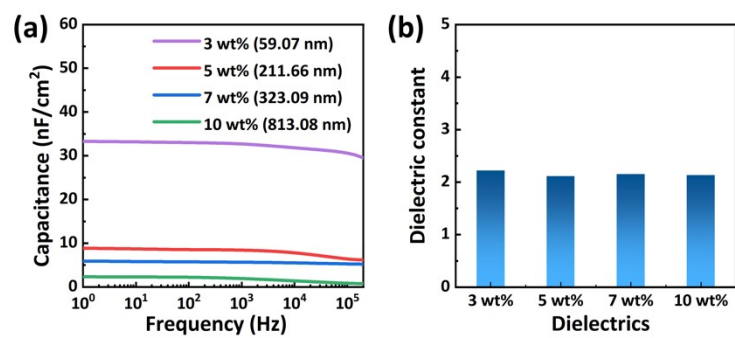

**Fig. S7.** The capacitance and dielectric constant of PSU dielectric.

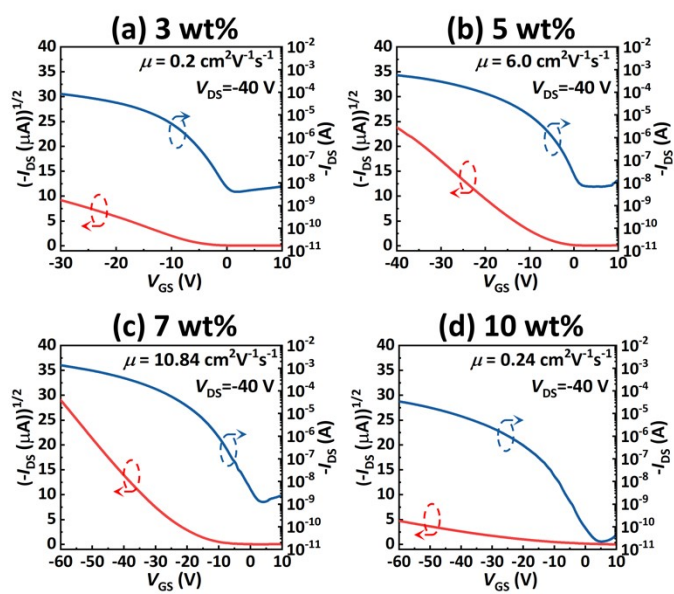

Fig. S8. The transfer curves of different thickness of PSU dielectric OFETs.

**Table S2.** Parameters for the PSU dielectric OFETs with different dielectric thickness.

| <b>Thickness</b><br><b>(nm)</b> | <b>Capacitance</b><br><b>(nF/cm<sup>2</sup>)</b> | <b>Dielectric</b><br><b>constant</b> | <b>On-state</b><br><b>current (A)</b> | <b>Mobility</b><br><b>(cm<sup>2</sup>V<sup>-1</sup>s<sup>-1</sup>)</b> |
|---------------------------------|--------------------------------------------------|--------------------------------------|---------------------------------------|------------------------------------------------------------------------|
| 59.07                           | 33.28                                            | 2.22                                 | $7.94 \times 10^{-5}$                 | 0.2                                                                    |
| 211.66                          | 8.85                                             | 2.11                                 | $5.56 \times 10^{-4}$                 | 6.0                                                                    |
| 323.09                          | 5.91                                             | 2.15                                 | $1.29 \times 10^{-3}$                 | 10.84                                                                  |
| 813.08                          | 2.32                                             | 2.13                                 | $3.28 \times 10^{-5}$                 | 0.24                                                                   |

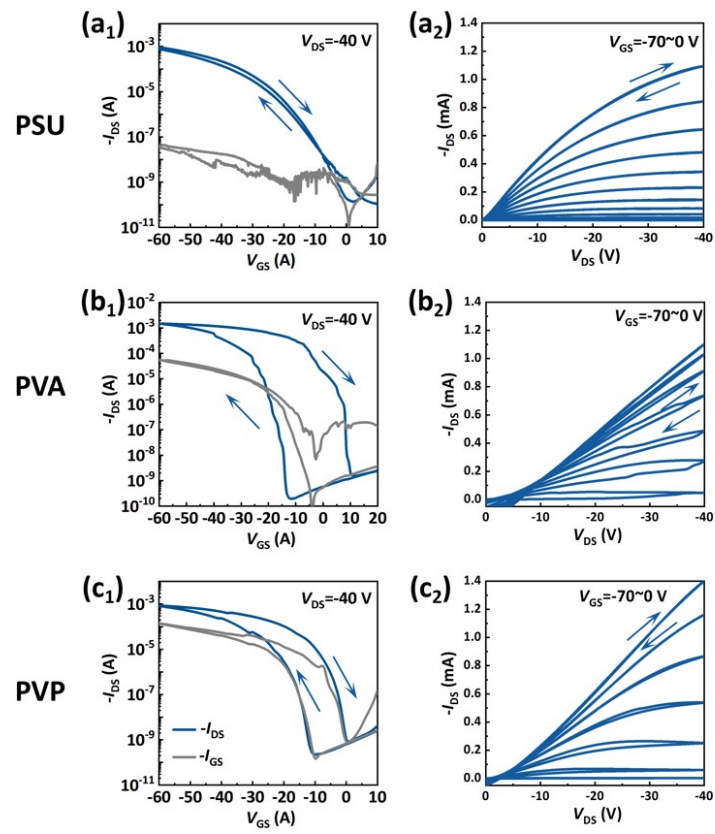

**Fig. S9.** The double sweep transfer and output curves of PSU, PVA, and PVP dielectric OFET.

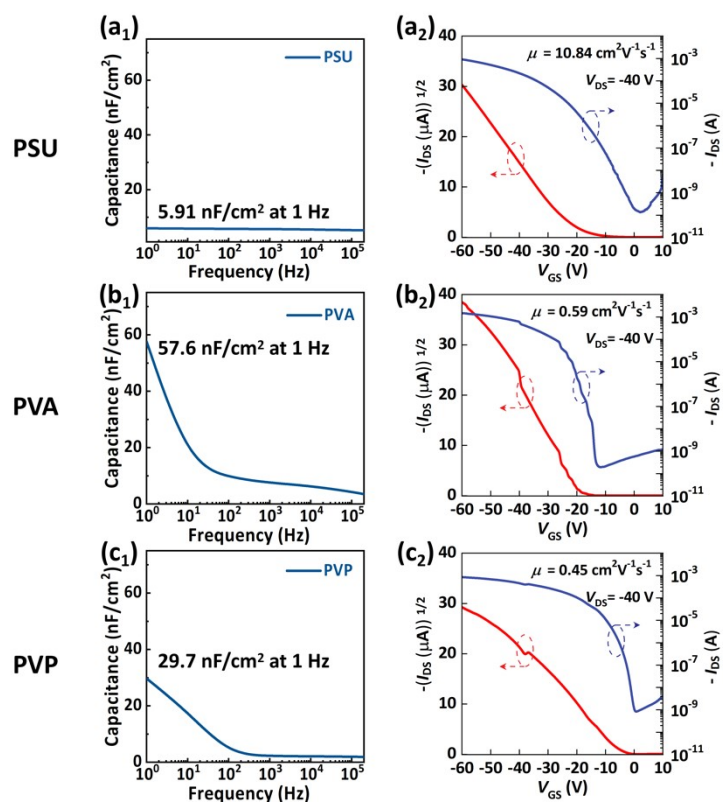

**Fig. S10.** The capacitance and transfer curves of PSU (a), PVA (b), and PVP (c) dielectric OFETs.

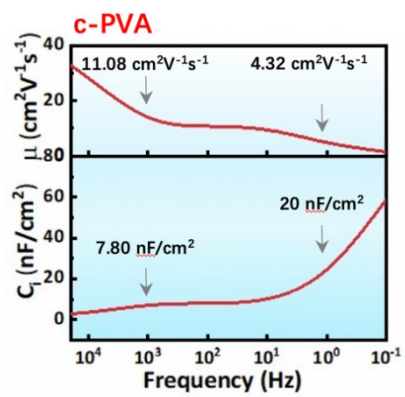

**Fig. S11.** The capacitance-frequency curves and the calculated mobility at different frequency of c-PVA dielectric OFETs.

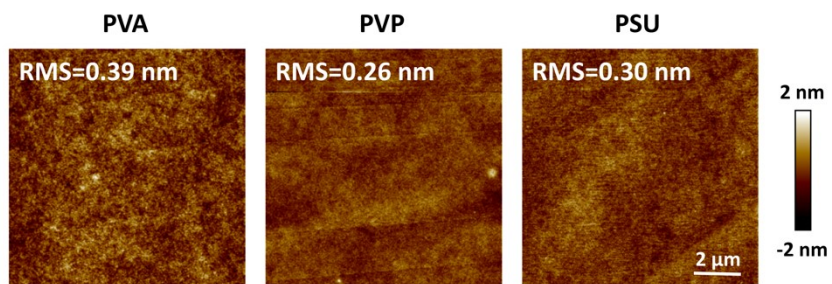

**Fig. S12.** The surface roughness of PVA, PVP, and PSU dielectrics.

**Table S3.** The surface energy of PVA, PVP, PSU dielectrics.

| Dielectrics | Contact angles |                                | $\gamma^p$<br>(mJ m <sup>-2</sup> ) | $\gamma^d$<br>(mJ m <sup>-2</sup> ) | $\gamma^{\text{total}}$<br>(mJ m <sup>-2</sup> ) |
|-------------|----------------|--------------------------------|-------------------------------------|-------------------------------------|--------------------------------------------------|
|             | DI<br>water    | CH <sub>2</sub> I <sub>2</sub> |                                     |                                     |                                                  |
| PVA         | 51             | 45                             | 18.72                               | 37.01                               | 55.74                                            |
| PVP         | 77.36          | 28.32                          | 3.35                                | 44.90                               | 48.25                                            |
| PSU         | 84.2           | 25                             | 1.37                                | 46.15                               | 47.52                                            |
| C8-BTBT     | 91.4           | 24.5                           | 0.27                                | 46.33                               | 46.60                                            |



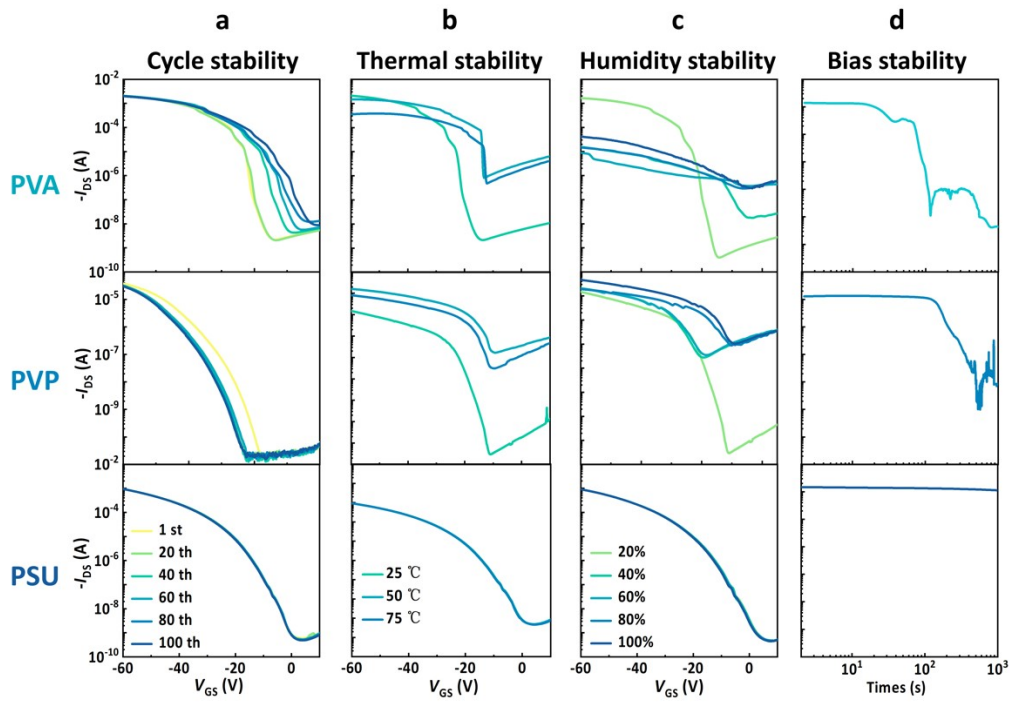

**Fig. S13.** Highly stable OFETs based on PSU dielectric compared with commercial PVA and PVP dielectrics. (a) Transfer curves within 100 cycles. (b-c) Transfer curves from 25 °C to 75 °C and humidity from 20% to 100%. (d) On-state currents with continuous testing for 1000 s.

**Table S4.** The polymer dielectric OFETs of the highest humidity.

| <b>Dielectrics</b>           | <b>Semicond<br/>uctor</b> | <b>Elect<br/>rode</b> | <b>Humidity<br/>(%)</b> | <b>Mobility<br/>(cm<sup>2</sup>V<sup>-1</sup>s<sup>-1</sup>)</b> | <b>Ref.</b>     |
|------------------------------|---------------------------|-----------------------|-------------------------|------------------------------------------------------------------|-----------------|
| PS                           | Pentacene                 | Au                    | 40~50%                  | 0.41                                                             | [15]            |
| Honey                        | P3HT                      | Au                    | 50%                     | /                                                                | [16]            |
| c-dextran                    | C8-BTBT                   | Au                    | 20~60%                  | 7.72                                                             | [17]            |
| PMMA/PVA                     | CuPc                      | Cu                    | 0~100%                  | 0.035                                                            | [18]            |
| PMMA/PMM<br>A<br>/PVA/PS/PVP | CuPc                      | Cu                    | 0~100%                  | 0.015                                                            | [19]            |
| <b>PSU</b>                   | <b>C8-BTBT</b>            | <b>Au</b>             | <b>20~100%</b>          | <b>10.84</b>                                                     | <b>Our work</b> |

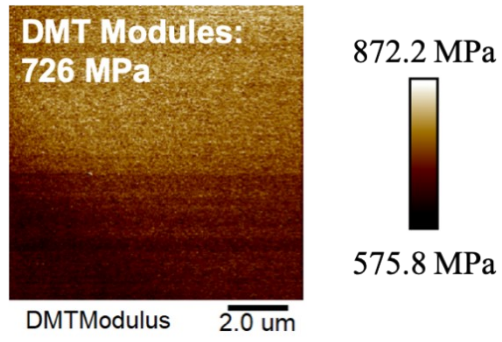

**Fig. S14.** Young's modulus of PSU dielectric.

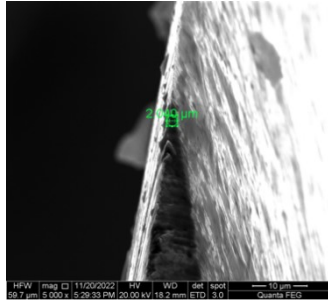

**Fig. S15.** The SEM images of the 1 μm bending radius.

## References

- [1] Wei H, Liu X, Wang A, et al. FeOx-supported platinum singleatom and pseudosingle-atom catalysts for chemoselective hydrogenation of functionalized nitroarenes[J]. *Nature Communications*, 2014, 5(1): 1-8.
- [2] Minari T, Nemoto T, Isoda S. Temperature and electric-field dependence of the mobility of a single-grain pentacene field-effect transistor[J]. *Journal of Applied Physics*, 2006, 99(3): 034506.
- [3] Lee H E, Kim S, Ko J, et al. Skin-like oxide thin-film transistors for transparent displays[J]. *Advanced Functional Materials*, 2016, 26(34): 6170-6178.
- [4] Trung T Q, Ramasundaram S, Hwang B U, et al. An all-elastomeric transparent and stretchable temperature sensor for body-attachable wearable electronics[J]. *Advanced Materials*, 2016, 28(3): 502-509.
- [5] Park Y J, Lee S K, Kim M S, et al. Graphene-based conformal devices[J]. *ACS Nano*, 2014, 8(8): 7655-7662.
- [6] Liang J, Tong K, Pei Q. A water-based silver-nanowire screen-print ink for the fabrication of stretchable conductors and wearable thin-film transistors[J]. *Advanced Materials*, 2016, 28(28): 5986-5996.
- [7] Kim J, Lee M S, Jeon S, et al. Highly transparent and stretchable field-effect transistor sensors using graphene-nanowire hybrid nanostructures[J]. *Advanced Materials*, 2015, 27(21): 3292-3297.
- [8] Liu J, Zhang H, Dong H, et al. High mobility emissive organic semiconductor[J]. *Nature Communications*, 2015, 6(1): 10032.
- [9] Chae S H, Yu W J, Bae J J, et al. Transferred wrinkled Al<sub>2</sub>O<sub>3</sub> for highly stretchable and transparent graphene-carbon nanotube transistors[J]. *Nature Materials*, 2013, 12(5): 403-409.
- [10] Lee S K, Kim B J, Jang H, et al. Stretchable graphene transistors with printed dielectrics and gate electrodes[J]. *Nano Letters*, 2011, 11(11): 4642-4646.
- [11] Cui N, Tang Q, Ren H, et al. A photolithographic stretchable transparent electrode for an all-solution-processed fully transparent conformal organic transistor array[J]. *Journal of Materials Chemistry C*, 2019, 7(18): 5385-5393.
- [12] Cui N, Ren H, Tang Q, et al. Fully transparent conformal organic thin-film transistor array and its application as LED front driving[J]. *Nanoscale*, 2018, 10(8): 3613-3620.
- [13] Viola F A, Barsotti J, Melloni F, et al. A sub-150-nanometre-thick and ultraconformable solution-processed all-organic transistor[J]. *Nature Communications*, 2021, 12(1): 5842.
- [14] Yuan Y, Giri G, Ayzner A L, et al. Ultra-high mobility transparent organic thin film transistors grown by an off-centre spin-coating method[J]. *Nature Communications*, 2014, 5(1): 3005.
- [15] Nigam A, Kabra D, Garg T, et al. Insight into the charge transport and degradation mechanisms in organic transistors operating at elevated temperatures in air[J]. *Organic Electronics*, 2015, 22: 202-209.
- [16] Sharova A S, Caironi M. Sweet electronics: Honey-gated complementary organic transistors and circuits operating in air[J]. *Advanced Materials*, 2021, 33(40): 2103183.
- [17] Yang Y, Sun H, Zhao X, et al. High-Mobility Fungus-Triggered Biodegradable Ultraflexible Organic Transistors[J]. *Advanced Science*, 2022, 9(13): 2105125.
- [18] Subbarao N V V, Gedda M, Iyer P K, et al. Organic field-effect transistors as high performance humidity sensors with rapid response, recovery time and remarkable ambient stability[J]. *Organic Electronics*, 2016, 32: 169-178.
- [19] Subbarao N V V, Gedda M, Iyer P K, et al. Enhanced environmental stability induced by effective polarization of a polar dielectric layer in a trilayer dielectric system of organic field-effect transistors: a quantitative study[J]. *ACS applied materials & interfaces*, 2015, 7(3): 1915-1924.
